# Supplementary material for: Physiological Concentrations of Cimicifuga racemosa Extract Do Not Affect Expression of Genes Involved in Estrogen Biosynthesis and Action in Endometrial and Ovarian Cell Lines
Source: MDPI journal article supplement (doi:10.3390/biom12040545), 2022-04-05
Supplement: s1 [file s1]

**Table S1.** Concentrations of *Cimicifuga racemosa* (CR) extract used for the gene expression studies.

| Cell Line | Concentrations of CR Extract in $\mu\text{g/mL}$ |
|-----------|--------------------------------------------------|
| HEC-1-A   | 0.005, 0.5, 50                                   |
| Ishikawa  | 0.005, 0.5                                       |
| RL-95-2   | 0.005, 0.5, 50, 100                              |
| KLE       | 0.005, 0.5, 50, 100                              |
| HIEEC     | 0.005, 0.5, 10, 25                               |
| Kuramochi | 0.005, 0.5, 50, 100                              |
| COV362    | 0.005, 0.5, 50                                   |
| OVSAHO    | 0.005, 0.5, 50                                   |
| HIO-80    | 0.005, 0.5, 25, 50                               |

**Table S2.** Concentrations of *Cimicifuga racemosa* (CR) extract used for Xcelligence experiments in KLE cells.

| Replica | Concentrations of CR Extract in $\mu\text{g/mL}$ |
|---------|--------------------------------------------------|
| 1.      | 400, 300, 200, 100, 50, 20, control              |
| 2.      | 300, 200, 100, 75, 50, 20, control               |

**Table S3.** Concentrations of *Cimicifuga racemosa* (CR) extract used for CC<sub>50</sub> studies.

| Cell Line | Concentrations of CR Extract in $\mu\text{g/mL}$ |
|-----------|--------------------------------------------------|
| HEC-1-A   | 1, 10, 25, 50, 100                               |
| Ishikawa  | 1, 10, 50, 100, 250, 500                         |
| RL-95-2   | 1, 5, 10, 50, 100, 250, 300                      |
| KLE       | 1, 5, 10, 50, 100, 300, 400                      |
| HIEEC     | 1, 5, 10, 20, 30, 50                             |
| Kuramochi | 1, 10, 50, 100, 150, 250                         |
| COV362    | 1, 10, 25, 50, 75, 100, 200, 300, 400            |
| OVSAHO    | 1, 10, 50, 100, 250, 500                         |
| HIO-80    | 1, 5, 10, 25, 50, 100, 150                       |
